# Supplementary material
Source: publisher figshare collection journal article supplement (https://gsapubs.figshare.com/ndownloader/files/34436711)
Supplement: Supplementary file 1 [file 34436711]

## Sheet: Sheet1
Project_ID	Contact_Name	Contact_Email	Citation	URL	Project_Name	License	Proprietary
263	Jaivime Evaristo	evaristo@sas.upenn.edu	unpublished		NV river water		0
269	Aaron Diefendorf	diefenan@ucmail.uc.edu	Not availiable yet; submitted		ADK lake water samples		1
119	Matthew Lachniet	Matthew.Lachniet@unlv.edu	Lachniet, M.S., Lawson, D.E., Stephen, H., Sloat, A.R. and Patterson, W.P. (2016) Isoscapes of d18O and d2H reveal climatic forcings on Alaska and Yukon precipitation. Water Resources Research, 52(8): 6575-6586.	https://doi.org/10.1002/2016WR019436	Lachniet AK rivers		0
226	Alexander Van Plantinga	acvanp@gmail.com	Vanplantinga, A.A., Grossman, E.L. and Roark, E.B. (2017) Chemical and isotopic tracer evaluation of water mixing and evaporation in a dammed Texas river during drought.¬†River Research and Applications,¬†33(3), 450-460.	https://doi.org/10.1002/rra.3080	Central Texas surface waters and groundwaters		0
48	Carol Kendall		Deacon, J.R., Lee, C.J., Toccalino, P.L., Warren, M.P., Baker, N.T., Crawford, C.G., Gilliom, R.G., and Woodside, M.D., 2015, Tracking water-quality of the Nation‚Äôs rivers and streams, U.S. Geological Survey Web page	https://10.5066/F70G3H51	NASQAN/HBN, C. Kendall Thesis (1993)		0
228	David Marchetti	dmarchetti@western.edu	Marchetti, D. W., & Marchetti, S. B. (2019). Stable isotope compositions of precipitation from Gunnison, Colorado 2007‚Äì2016: implications for the climatology of a high-elevation valley.¬†Heliyon,¬†5(7), e02120.	https://doi.org/10.1016/j.heliyon.2019.e02120	Marchetti Gunnison precip		0
11	J. Renee Brooks	Brooks.ReneeJ@epa.gov	J. R. Brooks et al. (2012) Willamette River Basin surface water isoscape (d18O and d2H): Temporal changes of source water within the river. Ecosphere 3(5):39 doi:10.1890/ES11-00338.1	https://dx.doi.org/10.1890/ES11-00338.1	EPA Willamette		0
115	Thomas Douglass	Thomas.A.Douglas@usace.army.mil	Douglas, T.A., Blum, J.D., Guo, L., Keller, K., Gleason, J.D. (2013) Hydrogeochemistry of seasonal flow regimes in the Chena River, a subarctic watershed draining discontinuous permafrost in interior Alaska (USA). Chemical Geology, 335(0): 48-62.	https://doi.org/10.1016/j.chemgeo.2012.10.045	Douglass Chena River		0
78	Jim Ehleringer	jim.ehleringer@utah.edu	personal communication, 2014		UT_water_DB		0
73	Brett Tipple	brett.tipple@utah.edu	Tipple, B.J. (2015) Isotope analyses of hair as a trace evidence tool to reconstruct human movements: combining strontium isotope with hydrogen/oxygen isotope data, Department of Justice, National Criminal Justice Reference Service, Document Number 248977, 51 pages._x000D_		Tipple DemoDataset		0
180			Ingraham and Taylor, 1991. Light stable isotope systematics of Large-scale hydrologic regimes in California and Nevada Water Resources Research, v27(1), pp. 77-90.	https://doi.org/10.1029/90WR01708	California and Nevada water		0
123	Scott Jasechko	sjasechk@ucalgary.ca	Jasechko, S., Wassenaar, L.I. and Mayer, B. (2017) Isotopic evidence for widespread cold-season-biased groundwater recharge and young streamflow across central Canada. Hydrological Processes: n/a-n/a.	https://doi.org/10.1002/hyp.11175	Jasechko 2017 Nelson Basin		0
122	Peter Lisi	peter.j.lisi@gmail.com	Lisi, P. J., D. E. Schindler, T. J. Cline, M. D. Scheuerell and P. B. Walsh (2015) Topography and snowmelt control stream thermal response to air temperature. Geophysical Research Letters, 42:3380-3388.	https://doi.org/10.1002/2015GL064083	Lisi 2015 AK Rivers		0
182	Alex Lechler	lechlear@plu.edu	Lechler, A.R. and Niemi, N.A. (2012) The influence of snow sublimation on the isotopic composition of spring and surface waters in the southwestern United States: Implications for stable isotope- based paleoaltimetry and hydrologic studies. GSA Bulletin, v123 (3-4), pp 318-334	https://dx.doi.org/10.1130/B30467.1	Lechler and Niemi-Snow Sublimation-GSAB, 2012		0
165	J. Renee Brooks	Brooks.Reneej@epa.gov	Personal Communication	https://www.epa.gov/national-aquatic-resource-surveys/nrsa	Natl Rivers and Streams Assessment 2008-2009		0
140	J. Renee Brooks	Brooks.Reneej@epa.gov	Personal Communication		NRSA 2013-2014		1
210	USGS Water Data Support Team		United States Geological Survey (2019) Water quality samples for the nation.	https://nwis.waterdata.usgs.gov/nwis/	US Water Quality Field/Lab Samples		0
132	Jasper Oshun	matazzter@gmail.com	Oshun, J.,¬†W. E. Dietrich,¬†T. E. Dawson, and¬†I. Fung¬†(2016),¬†Dynamic, structured heterogeneity of water isotopes inside hillslopes,¬†Water Resour. Res.,¬†52,¬†164‚Äì189, doi:10.1002/2015WR017485.	http://doi.org/10.1002/2015WR017485	Rivendell Hydrology		0
155	J. Renee Brooks	Brooks.ReneeJ@EPA.gov	Brooks, J. R., D. M. Mushet, M. K. Vanderhoof, S. G. Leibowitz, J. Christensen, B. Neff, D. O. Rosenberry, W. Rugh, and L. C. Alexander. 2018. Estimating wetland connectivity to streams in the prairie pothole region: An isotopic and remote sensing approach. Water Resources Research, 54, 955‚Äì977 DOI:10.1002/2017WR021016	https://dx.doi.org/10.1002/2017WR021016	Pipestem Creek Prairie Pothole isotope measurement		0
97	Gabriel Bowen	gabe.bowen@utah.edu			Wabash River Valley		0
56	Crystal Tulley-Cordova	tulleycordova@gmail.com	personal communication, 2014		RBC		0
184	Rich Fiorella	rich.fiorella@utah.edu	Rich Fiorella - Survey of NW Wyoming Surface Waters	https://dx.doi.org/10.5281/zenodo.1285261	Wyoming 2012 Surface Waters		0
130	Christopher Duffy	¬†emt175@psu.edu	Duffy, Christopher J.; Thomas, Evan M. (2011). "CZO Dataset: Shale Hills - Stable Isotopes, Stream Water Chemistry (2008-2011)." Retrieved 15 Jun 2017, from http://criticalzone.org/national/data/dataset/2594/	http://criticalzone.org/national/data/dataset/2594/	Shale Hills CZO Stable Isotope Stream Water Data		0
33	Yusuf Jameel	yusuf8ysf@gmail.com	unpublished		iUtah water survey		0
88	John Carricaburu				John Carricaburu (USGS) Misc Samples		0
19	Yusuf Jameel	yusuf8ysf@gmail.com	M. Y. Jameel et al. (2018) Physicochemical characteristics of a southern Lake Michigan river plume. Journal of Great Lakes Research. 44(2) 209-218 doi:10.1016/j.jglr.2018.01.003	https://doi.org/10.1016/j.jglr.2018.01.003	GLFT		0
79	Gabriel Bowen	gabe.bowen@utah.edu			Wabash Sampling Blitz		0
64	Gabriel Bowen	gabe.bowen@utah.edu			SPATIAL Short Course		0
65	Yusuf Jameel	yusuf8ysf@gmail.com	Jameel, Y., Brewer, S., Fiorella, R. P., Tipple, B. J., Terry, S., & Bowen, G. J. (2018). Isotopic reconnaissance of urban water supply system dynamics. Hydrology and Earth System Sciences, 22(11), 6109-6125.	https://doi.org/10.5194/hess-22-6109-2018	Jordan Valley Watershed		0
95	Paul Brooks	paul.brooks@utah.edu			Brooks Lab group water samples		0
66	Crystal Tulley-Cordova	tulleycordova@gmail.com	personal communication, 2018		Navajo Nation Water Sampling		0
211	National Ecological Observatory Network		National Ecological Observatory Network. 2019 and after. Provisional data downloaded from http://data.neonscience.org. Battelle, Boulder, CO, USA	https://www.neonscience.org/data	NEON		0
251	Lucy Jordan	lucyjordan@utah.gov			Ogden Valley Water		0
98	Lesley Chesson	lesley@isoforensics.com	personal communication, 2016		Isoforensics waters		0
117	Rose Smith	Smithrose24@gmail.com	Follstad Shah, J.J., Jameel, Y., Smith, R.M., Gabor, R.S., Brooks, P.D., and Weintraub, S.R.. 2019. Spatiotemporal Variability in Water Sources Controls Chemical and Physical Properties of a Semi-arid Urban River System. Journal of the American Water Resources Association 1‚Äì 17.	https://doi.org/10.1111/1752-1688.12734	Jordan River Study		0
249	Hugh Hurlow	hughhurlow@utah.gov			WRI		0
239	Paul Inkenbrandt	paulinkenbrandt@utah.gov			Juab Valley		0
237	Janae Wallace	janaewallace@utah.gov			Castle Valley Groundwater		0
240	Hugh Hurlow	hughhurlow@utah.gov			Grouse Creek WRI		0
183	Melanie Beasley	melmbeasley@gmail.com	personal communication, 2018		Miscellaneous waters		0
199	Anna Stanczyk	a.stanczyk@utah.edu	personal communication (future paper)		Hop Valley and La Verkin Water Samples		0
99	Gabriel Bowen	gabe.bowen@utah.edu	unpublished		Courses and misc		0
195	Rich Fiorella	rich.fiorella@utah.edu			Rich Winds Trip		0
243	Janae Wallace	janaewallace@utah.gov			Bryce Canyon Water Study		0
257	Dr. Rebecca Barnes	rbarnes@coloradocollege.edu			Monument Creek Watershed Samples		0
21	Yusuf Jameel	yusuf8ysf@gmail.com	Personal communication (2013)		GSL		0
3	Gabriel Bowen	gabe.bowen@utah.edu	Personal communication (2013)		Big Bend		0
215	Ate Visser	visser3@llnl.gov	Visser, A., Thaw, M., Deinhart, A., Bibby, R., Safeeq, M., Conklin, M., ... & Van der Velde, Y. (2019). Cosmogenic Isotopes Unravel the Hydrochronology and Water Storage Dynamics of the Southern Sierra Critical Zone. Water Resources Research, 55(2), 1429-1450.	https://agupubs.onlinelibrary.wiley.com/doi/full/10.1029/2018WR023665	Southern Sierra 2019		0
236	Paul Inkenbrandt	paulinkenbrandt@utah.gov			Round Valley Hydrology		0
232	Paul Inkenbrandt	paulinkenbrandt@utah.gov	Inkenbrandt, P. (2016) Aquifer storage and recovery in Millville, Cache County, Utah. Utah Geological Survey 275, 94 p.	https://ugspub.nr.utah.gov/publications/reports_of_investigations/ri-275.pdf	Millville Aquifer Recharge		0
252	Paul Inkenbrandt	paulinkenbrandt@utah.gov	Inkenbrandt, P.C., Kirby, S.M., and Dame, B. (2016) Hydrogeology of the Powder Mountain area, Weber and Cache Counties, Utah. Utah Geological Survey Special Study 156, 62 p.	https://ugspub.nr.utah.gov/publications/special_studies/ss-156/ss-156.pdf	Powder Mountain Water		0
233	Janae Wallace	janaewallace@utah.gov			Sanpete Salinity		0
186			Williams, A.E. and Rodoni, D.P. Regional isotope effects and application to hydrologic investigations in southwestern California, Water Resour. Res., 33(7), 1721‚Äì1729	https://dx.doi.org/10.1029/97WR01035	Williams and Rodoni So Cal Waters		0
222	Charles J. Yonge	Chas-karst@telus.net	Yonge, Goldenberg, and Krouse, 1989. An isotope study of water bodies along a traverse of southwestern Canada. Journal of Hydrology, 106, 245-255.	https://doi.org/10.1016/0022-1694(89)90075-9	Water bodies of SW Canada		0
205	Lu Zhu	lu.zhu@uta.edu	Zhu L., Fan M., Hough B. and Li L. (2018) Spatiotemporal distribution of river water stable isotope compositions and variability of lapse rate in the central Rocky Mountains: Controlling factors and implications for paleoelevation reconstruction. Earth and Planetary Science Letters, 496, 215-226.	https://doi.org/10.1016/j.epsl.2018.05.047	Zhu western rivers		0
180			Ingraham and Taylor, 1991. Light stable isotope systematics of Large-scale hydrologic regimes in California and Nevada Water Resources Research, v27(1), pp. 77-90.	https://doi.org/10.1029/90WR01708	California and Nevada water		0
122	Peter Lisi	peter.j.lisi@gmail.com	Lisi, P. J., D. E. Schindler, T. J. Cline, M. D. Scheuerell and P. B. Walsh (2015) Topography and snowmelt control stream thermal response to air temperature. Geophysical Research Letters, 42:3380-3388.	https://doi.org/10.1002/2015GL064083	Lisi 2015 AK Rivers		0
182	Alex Lechler	lechlear@plu.edu	Lechler, A.R. and Niemi, N.A. (2012) The influence of snow sublimation on the isotopic composition of spring and surface waters in the southwestern United States: Implications for stable isotope- based paleoaltimetry and hydrologic studies. GSA Bulletin, v123 (3-4), pp 318-334	https://dx.doi.org/10.1130/B30467.1	Lechler and Niemi-Snow Sublimation-GSAB, 2012		0
251	Lucy Jordan	lucyjordan@utah.gov			Ogden Valley Water		0
64	Gabriel Bowen	gabe.bowen@utah.edu			SPATIAL Short Course		0
163	Annie Putman	putmanannie@gmail.com	Personal communication		Snow and Avy Class project		0
239	Paul Inkenbrandt	paulinkenbrandt@utah.gov			Juab Valley		0
257	Dr. Rebecca Barnes	rbarnes@coloradocollege.edu			Monument Creek Watershed Samples		0
190			Development of a Local Meteoric Water Line for Southeastern Idah, Western Wyoming, and South-Central Montana. USGS Scientific Investigations Report 2004-5126	https://pubs.usgs.gov/sir/2004/5126/pdf/sir2004-5126.pdf	USGS Yellowstone LMWL		0
206	Amy Steimke	Amy.Steimke@idwr.idaho.gov		https://data-idwr.opendata.arcgis.com/pages/gis-data	ID Groundwater Quality Database (EDMS)		0
180			Ingraham and Taylor, 1991. Light stable isotope systematics of Large-scale hydrologic regimes in California and Nevada Water Resources Research, v27(1), pp. 77-90.	https://doi.org/10.1029/90WR01708	California and Nevada water		0
182	Alex Lechler	lechlear@plu.edu	Lechler, A.R. and Niemi, N.A. (2012) The influence of snow sublimation on the isotopic composition of spring and surface waters in the southwestern United States: Implications for stable isotope- based paleoaltimetry and hydrologic studies. GSA Bulletin, v123 (3-4), pp 318-334	https://dx.doi.org/10.1130/B30467.1	Lechler and Niemi-Snow Sublimation-GSAB, 2012		0
210	USGS Water Data Support Team		United States Geological Survey (2019) Water quality samples for the nation.	https://nwis.waterdata.usgs.gov/nwis/	US Water Quality Field/Lab Samples		0
253	Hank Johnson	hjohnson@usgs.gov			Oregon in progress		1
132	Jasper Oshun	matazzter@gmail.com	Oshun, J.,¬†W. E. Dietrich,¬†T. E. Dawson, and¬†I. Fung¬†(2016),¬†Dynamic, structured heterogeneity of water isotopes inside hillslopes,¬†Water Resour. Res.,¬†52,¬†164‚Äì189, doi:10.1002/2015WR017485.	http://doi.org/10.1002/2015WR017485	Rivendell Hydrology		0
64	Gabriel Bowen	gabe.bowen@utah.edu			SPATIAL Short Course		0
66	Crystal Tulley-Cordova	tulleycordova@gmail.com	personal communication, 2018		Navajo Nation Water Sampling		0
98	Lesley Chesson	lesley@isoforensics.com	personal communication, 2016		Isoforensics waters		0
249	Hugh Hurlow	hughhurlow@utah.gov			WRI		0
239	Paul Inkenbrandt	paulinkenbrandt@utah.gov			Juab Valley		0
241	Janae Wallace	janaewallace@utah.gov		https://cida.usgs.gov/ngwmn/	National Groundwater Monitoring Network		0
33	Yusuf Jameel	yusuf8ysf@gmail.com	unpublished		iUtah water survey		0
240	Hugh Hurlow	hughhurlow@utah.gov			Grouse Creek WRI		0
231	Stefan Kirby	stefankirby@utah.gov	Kirby, S.M., Inkenbrandt, P.C., and Rupke, A. (2019) Mapping groundwater quality and chemistry adjacent to Great Salt Lake, Utah. Utah Geological Survey 699, 25 p.	https://ugspub.nr.utah.gov/publications/open_file_reports/ofr-699/ofr-699.pdf	Great Salt Lake Chemistry Compilation		0
199	Anna Stanczyk	a.stanczyk@utah.edu	personal communication (future paper)		Hop Valley and La Verkin Water Samples		0
243	Janae Wallace	janaewallace@utah.gov			Bryce Canyon Water Study		0
225	Gabriel Bowen	gabe.bowen@utah.edu			2019 Groundwater		0
3	Gabriel Bowen	gabe.bowen@utah.edu	Personal communication (2013)		Big Bend		0
238	Hugh Hurlow	hughhurlow@utah.gov	Hurlow, H. (2014) Hydrogeologic studies and groundwater monitoring in Snake Valley and adjacent hydrographic areas, west-central Utah and east-central Nevada. Utah Geological Survey 135, 304 p.	https://ugspub.nr.utah.gov/publications/bulletins/b-135/b-135txt.pdf	Snake Valley		0
232	Paul Inkenbrandt	paulinkenbrandt@utah.gov	Inkenbrandt, P. (2016) Aquifer storage and recovery in Millville, Cache County, Utah. Utah Geological Survey 275, 94 p.	https://ugspub.nr.utah.gov/publications/reports_of_investigations/ri-275.pdf	Millville Aquifer Recharge		0
246	Stefan Kirby	stefankirby@utah.gov		https://utahforge.com/	FORGE Geothermal Study		0
236	Paul Inkenbrandt	paulinkenbrandt@utah.gov			Round Valley Hydrology		0
252	Paul Inkenbrandt	paulinkenbrandt@utah.gov	Inkenbrandt, P.C., Kirby, S.M., and Dame, B. (2016) Hydrogeology of the Powder Mountain area, Weber and Cache Counties, Utah. Utah Geological Survey Special Study 156, 62 p.	https://ugspub.nr.utah.gov/publications/special_studies/ss-156/ss-156.pdf	Powder Mountain Water		0
251	Lucy Jordan	lucyjordan@utah.gov			Ogden Valley Water		0
233	Janae Wallace	janaewallace@utah.gov			Sanpete Salinity		0
250	Janae Wallace	janaewallace@utah.gov			Ephriam ASR		0
186			Williams, A.E. and Rodoni, D.P. Regional isotope effects and application to hydrologic investigations in southwestern California, Water Resour. Res., 33(7), 1721‚Äì1729	https://dx.doi.org/10.1029/97WR01035	Williams and Rodoni So Cal Waters		0
222	Charles J. Yonge	Chas-karst@telus.net	Yonge, Goldenberg, and Krouse, 1989. An isotope study of water bodies along a traverse of southwestern Canada. Journal of Hydrology, 106, 245-255.	https://doi.org/10.1016/0022-1694(89)90075-9	Water bodies of SW Canada		0

## Sheet: G49634
Kelson, J.R., et al., 2022, Looking upstream with clumped and triple oxygen isotopes of estuarine oyster shells in the early Eocene of California, USA: Geology, v. 50, https://doi.org/10.1130/G49634.1
